# Supplementary material
Source: publisher site journal article supplement (https://www.dovepress.com/get_supplementary_file.php?f=495455.docx)
Supplement: Supplementary file 1 [file get_supplementary_file.php]

**Appendix**

**Supplementary Table 1. Checklist for Reporting Results of Internet E-Surveys (CHERRIES)**

| ***Checklist Item*** | ***Explanation*** | ***Page Number*** |
| --- | --- | --- |
| Describe survey design | The questionnaire was an open survey spread in the general population. No inclusion/exclusion criteria were applied. | 4 |
| IRB approval | This study was conducted in accordance with the Declaration of Helsinki and was ratified by the French Ethical Committee South-East VI (Clinicaltrials.gov NCT04538586). | 4 |
| Informed consent | Participants' consent is obtained from the moment participants choose to answer the questionnaire. | 4 |
| Data protection | Data were collected on the secure REDCap® platform, hosted by University Hospital of Clermont-Ferrand. | 4 |
| Development and testing | We used the secure internet application REDCap® to build and manage the questionnaire, hosted by the University Hospital of Clermont-Ferrand. The questionnaire was tested on a sample of respondents prior to dissemination. | 4 |
| Open survey versus closed survey | This is an open survey, accessible to anyone who scan the QR code, copy paste the link to the survey, or through the COVISTRESS.org website. | 4 |
| Contact mode | The questionnaire was disseminated electronically using all means (mailing list of organizations, social media such as Facebook, Twitter or LinkedIn, flyers distributed in supermakets, shops and medical offices, etc). | 4 |
| Advertising the survey | The questionnaire was disseminated electronically using all means (mailing list of organizations, social media such as Facebook, Twitter or LinkedIn, flyers distributed in supermakets, shops and medical offices). | 4 |
| Web/E-mail | The survey was carried out anonymously via a website, without the use of personal e-mail of responders to collect responses. | 4 |
| Context | The COVISTRESS study started before the pandemic. Through this questionnaire, we wish to follow the evolution of the populations regarding their stress, perception of work and lifestyle habits. This study is an international collaboration between several institutions (University Hospitals, Universities, Research centers, Occupational Health). | 4 |
| Mandatory/voluntary | Participation is voluntary. | 4 |
| Incentives | No incentives (monetary or otherwise) were offered to participants. | 4 |
| Time/Date | Data was collected between November 2020 and October 2021. | 4 |
| Randomization of items or questionnaires | No randomization of items. Items are fixed. | NA |
| Adaptive questioning | This questionnaire uses adaptive questions to reduce the number and complexity of questions (some items are only displayed according to responses to other items). | NA |
| Number of Items | The number of questions per page varies from 1 to 10. | NA |
| Number of screens (pages) | The main questionnaire has 18 screens, while the sleep questionnaire has just one. | NA |
| Completeness check | Researchers know whether a respondent chose to don’t answer some items. | NA |
| Review step | It is possible to go back to modify these answers by pressing the back key. | NA |
| Unique site visitor | We do not provide viewing or participation rates. | NA |
| View rate (Ratio of unique survey visitors/unique site visitors) | The view rate was not used in this study. | NA |
| Participation rate (Ratio of unique visitors who agreed to participate/unique first survey page visitors) | The participation rate was not used in this study. | NA |
| Completion rate (Ratio of users who finished the survey/users who agreed to participate) | The completion rate was not used in this study. | NA |
| Cookies used | No cookies were used | NA |
| IP check | The client computer's IP address has not been used to identify any duplicate entries from the same user. | NA |
| Log file analysis | No techniques were used to identify multiple entries. | NA |
| Registration | Not required for this open investigation. | 4 |
| Handling of incomplete questionnaires | We excluded participants who did not answer to the main outcome i.e. who did not answer to the number of hours of sleep. | 4 and Figure 1 |
| Questionnaires submitted with an atypical timestamp | We did not exclude participants with an atypical timestamp as 25% of the workforce work at night. However, >95% of respondents answered in daytime or evening. | NA |
| Statistical correction | No statistical correction was made to adjust for the non-representativeness of the sample. | NA |

*This checklist has been modified from Eysenbach G. Improving the quality of Web surveys: the Checklist for Reporting Results of Internet E-Surveys (CHERRIES). J Med Internet Res. 2004 Sep 29;6(3):e34 [erratum in J Med Internet Res. 2012; 14(1): e8.]. Article available at [https://www.jmir.org/2004/3/e34](https://www.jmir.org/2004/3/e34/)/; erratum available <https://www.jmir.org/2012/1/e8/>. Copyright ©Gunther Eysenbach. Originally published in the* [*Journal of Medical Internet*](http://www.jmir.org) *Research, 29.9.2004 and 04.01.2012.*

*This is an open-access article distributed under the terms of the Creative Commons Attribution License (*[*https://creativecommons.org/licenses/by/2.0/*](https://creativecommons.org/licenses/by/2.0/)*), which permits unrestricted use, distribution, and reproduction in any medium, provided the original work, first published in the Journal of Medical Internet Research, is properly cited.*

**Supplementary Figure 1.** Factors influencing total sleep time (multivariate linear regression).

Bold values represent significant p-values (i.e., less than 0.05). Using sleep time as a continuous variable, an advanced age (coefficient -0.20, 95CI -0.33 to -0.06) and a high level of stress at work (-0.20, -0.41 to -0.01) are both correlated with a shorter sleep time (p=0.004 and p=0.047). Smoking and the use of social network tend to reduce the number of hours of sleep (p=0.056 and p=0.055). Telework tend to improve the number of hours of sleep (p=0.053).

**Supplementary Figure 2.** Factors influencing prevalence of sleeping less than 6 hours (multivariate logistic regression).

Bold values represent significant p-values (i.e., less than 0.05). Using sleep time as a qualitative variable, a high level of stress at work (odds ratio 1.90, 95CI 1.16 to 3.10), at home (1.68, 1.09 to 2.58) and smoking (2.55, 1.08 to 5.99) are risk factors for sleeping less than 6h (p=0.010, p=0.018 and p=0.032).
